# Supplementary material
Source: PubMed Central journal article supplement (PMC4909513)
Supplement: NIHMS761413-supplement-01.pdf [file NIHMS761413-supplement-01.pdf]

## **Supplementary Methods**

### *Histology.*

Esophagi, tongue, forestomach, and ventral neck skin were removed from 1 month-old, 1.5 month-old, and 3 month-old, littermate control and *ED-L2-Cre/Rosa26-IKK2ca<sup>SFL</sup>* mice, examined grossly, and then processed for histology. Briefly, tissue was fixed in 10% Buffered Formalin Phosphate (Fisher Scientific) or Zinc Formalin (Polysciences Inc, Warrington, PA) and embedded in paraffin, and 5- $\mu$ m sections were applied to X-tra slides (Leica Biosystems, Buffalo Grove, IL). Slides were stained with hematoxylin and eosin, and images were captured on a Nikon Eclipse E600 microscope with a Photometrics CoolSNAP charge-coupled device camera (Roper Scientific, Tucson, AZ). The following numbers of matched littermate control and mutant mice were examined histologically: age 1 month, 6 controls and 6 mutants; age 1.5 months, 8 controls and 8 mutants; age 3 months, 5 controls and 5 mutants.

### *Cell Culture, Infection, and Transfection.*

Cells were grown in keratinocyte serum-free medium (K-SFM, Invitrogen, Carlsbad, CA) supplemented with 40  $\mu$ g/ml bovine pituitary extract (Life Technologies), 5 ng/ml epidermal growth factor (EGF) (Life Technologies), 100 units/ml penicillin, and 100  $\mu$ g of streptomycin (Life Technologies). To express mouse and human *IKK $\beta$* , cDNAs were subcloned into the pBabe-puro vector (Addgene plasmid # 1764) and the pFB-neo vector (Agilent Technologies, Wilmington, DE). For retroviral packaging, pBabe-puro and pFB-neo retroviral vectors were transfected into Phoenix-Ampho or Phoenix-Eco cells with Lipofectamine 2000 according to the manufacturer's instructions. Virus-containing medium was harvested 48 hours after transfection and filtered with 0.45 $\mu$ M Millex HV filters (EMD Millipore, Temecula, CA). Keratinocytes

were infected with culture supernatants from individual Phoenix-Ampho or Phoenix-Eco cells at a 1:3 dilution in KSFM. Cells selected after 48 hours with 1µg/ml puromycin (Sigma-Aldrich, St-Louis, MO) or 150 µg/ml G418 (Corning) for 10 days.

#### *Immunofluorescence, Immunohistochemistry*

Following microwave or proteinase K (for CD31 only) antigen retrieval, slides were incubated with one of the following primary antibodies: 1:500 rat anti-CD31 (BD Biosciences); 1:500 goat anti-GFP (Abcam, Cambridge, MA); 1:50 rat anti-CD45 (BD Biosciences); 1:500 mouse anti-desmin (Sigma-Aldrich), or 1:1,000 VWF (Dako, Carpinteria, CA). For CD31/Desmin co-staining, frozen esophageal sections fixed in cold acetone were used. Species-specific secondary antibodies were added, and detection was performed as previously described<sup>1</sup>. For fluorescent labeling, 1:600 Cy2 or 1:600 Cy3 (Jackson ImmunoResearch, West Grove, PA) was used.

#### *Cell proliferation and apoptosis analyses.*

We injected littermate control and *ED-L2-Cre/Rosa26-IKK2ca<sup>SFL</sup>* mice with BrdU labeling reagent (Zymed, San Francisco, CA) 60 minutes before death. After death, esophagi were removed and processed as described earlier. Following microwave antigen retrieval, slides were incubated with rat anti-BrdU antibody (1: 1:15,000) (Accurate Chemicals and Scientific Corporation, Westbury, NY). The proliferative index was determined by counting the number of BrdU-labeled cells per 100 basal cells in a least 5 distinct regions of esophagi from at least 4 *ED-L2-Cre/Rosa26-IKK2ca<sup>FL</sup>* mice and 4 littermate controls. Results were expressed as number of labeled cells ± standard error of the mean. TUNEL was performed using the In Situ Cell Death

Fluorescein Detection Kit (Sigma) according to the manufacturer's instructions.

#### *Tissue microarray.*

Tissue microarrays of human biopsies from esophageal squamous cell cancer (n =96), adjacent normal esophagus (n =38), adjacent inflamed esophagus (n=12) and normal esophagus (n=5) were stained using the following antibodies: p65 NFkappaB, GM-CSF and VWF. Staining intensity was scored on a scale of 0–4 (0 = none, 1= mild or weak, 2 = moderate, 3 = intense, 4 = very intense) by a pathologist (AJK-S) in a blinded fashion. Inflamed esophagus was defined as tissue with a CD45 score  $\geq 2$ . Details on the numbers of specimens analyzed for each of the markers across patient diagnoses are illustrated in Supplementary Table 4.

#### *Western blots*

For each sample, 20  $\mu$ g of total protein was separated on a NuPAGE 4–12% bis-tris acrylamide gel (Life Technologies) and transferred onto polyvinylidene difluoride membrane (Millipore). After blocking, membranes were incubated overnight at 4°C with 1:2,000 rabbit anti-IKK $\beta$  (Cell Signaling), 1:1,000 rabbit anti-I $\kappa$ B $\alpha$  antibody (Cell Signaling), and 1:10,000 mouse anti- $\beta$ -actin (Sigma-Aldrich, St. Louis, MO). Membranes were then incubated with a 1:10,000 dilution of anti-rabbit/horseradish peroxidase or anti-mouse/horseradish peroxidase (GE Healthcare Bio-Sciences, Piscataway, NJ) and developed with Immobilon ECL (Millipore).

#### *RNA analyses.*

For quantitative real-time PCR, the TATA box binding protein or Glyceraldehyde-3-

phosphate dehydrogenase genes were used as the internal control. Reverse transcription was performed with the Maxima First-Strand cDNA Synthesis for RT-qPCR kit (Thermo Scientific) following the manufacturer's instructions. Primer sequences are available upon request. RT<sup>2</sup> Profiler PCR Array Mouse Cytokines & Chemokines (Qiagen) was utilized to examine cytokine expression for 3 pairs of 4 week-old mice.

*Flow cytometry.*

For flow cytometric analysis of *in vivo* experiments, spleen and esophagus were harvested at 6 weeks of age. Single-cell suspensions were prepared and red blood cells were lysed using ACK Lysis Buffer (Life Technologies). Live/dead cell discrimination was performed using Live/Dead Fixable Aqua Dead Cell Stain Kit (Life Technologies). Cell surface staining was done for 20–30 min. Intracellular staining was done using a fixation/permeabilization kit (eBioscience.) T helper cells were phenotyped as CD45<sup>+</sup>CD3<sup>+</sup>CD4<sup>+</sup>, cytotoxic T lymphocytes as CD45<sup>+</sup>CD3<sup>+</sup>Cd8<sup>+</sup>, T cells as CD45<sup>+</sup>CD3<sup>+</sup>, myeloid derived suppressor cells (MDSC) as CD45<sup>+</sup>CD11b<sup>+</sup>Gr-1<sup>+</sup>, dendritic cells as CD45<sup>+</sup>CD11c<sup>+</sup>, natural killer cells as CD45<sup>+</sup>, CD49b<sup>+</sup>, macrophages as CD45<sup>+</sup>F4/80<sup>+</sup>, and regulatory T cells (Treg cells) as CD45<sup>+</sup>CD3<sup>+</sup>CD4<sup>+</sup>CD44<sup>+</sup>FOXP3<sup>+</sup>. All flow cytometric analyses were done using an LSR II (BD) and analysed using FlowJo software (TreeStar).

*Antibodies for flow cytometry.*

Antibodies for flow cytometry are provided in the table below.

| <b>Antibody</b> | <b>Clone</b> | <b>Fluorophore</b> | <b>Company</b> |
|-----------------|--------------|--------------------|----------------|
| CD49b           | DX5          | FITC               | BD Biosciences |

|           |          |              |                   |
|-----------|----------|--------------|-------------------|
| CD4       | RM4-5    | V450         | BD Biosciences    |
| Live/Dead | N/A      | AmCyan       | Life Technologies |
| CD44      | 1M7      | BV 785       | Biolegend         |
| CD11c     | N418     | QD605        | Biolegend         |
| FoxP3     | Fjk-16s  | APC          | ebioscience       |
| CD45.2    | 104      | AF700        | Biolegend         |
| CD11b     | M1/70    | PE           | BD Biosciences    |
| F4/80     | BM8      | PE-Cy7       | Biolegend         |
| CD3       | 14S-2C11 | PE-Cy5       | Biolegend         |
| CD8       | 53-6.7   | PE-Texas Red | BD Biosciences    |

*Statistical analyses.*

For flow cytometry analyses, Student *t* tests were used to indicate the statistical difference between the groups using SAS, version 9.3 (SAS Inc. Cary, NC). As the cell counts were not normally distributed, these were log-transformed for statistical analyses. To allow us to combine all the data into a single model, adjusting for organ type and repeated measures within subject, a GEE (generalized estimating equations) model was run with the log transformed cell count as the outcome, stratified by cell type. Predictors were organ and mutant/control status. For mouse studies, the numbers of animals per group were chosen to allow us to detect differences in the proportion of mice having angiogenesis using 81% power and an alpha-level of 0.05. For human tissue microarray experiments, we included a small pilot patient sample in order to explore initial consistency of our findings in clinical populations. Since this patient population served as an exploratory sub-study, no formal power calculations were performed.

Descriptive statistics summarized patient tissue characteristics, both demographic/clinical and markers. A series of Spearman sample correlation coefficients and their respective 95% confidence intervals were used to compare associations between markers and clinical variables. In order to compare mean marker values across tissue types, we employed a series of linear mixed models with random patient effect (to account for within patient association if a patient contributed more than one tissue sample) and fixed tissue effects. Model estimated pairwise differences across tissue types were compared via least squares means with adjustment (Tukey-Kramer) for multiple pairwise comparisons. All statistical tests assumed a 5% level of significance. Figures for tissue microarray experiments were generated in SAS (version 9.4, copyright 2012, The SAS Institute Inc., Cary, NC).

## **References**

1. Yang Y, Goldstein BG, Nakagawa H, et al. Kruppel-like factor 5 activates MEK/ERK signaling via EGFR in primary squamous epithelial cells. *Faseb J* 2007;21:543-50.

| <b>Supplemental Table 1: Differentially expressed cytokines in esophageal epithelia by quantitative PCR array</b> |                |                            |         |
|-------------------------------------------------------------------------------------------------------------------|----------------|----------------------------|---------|
| Gene name                                                                                                         | Gene Symbol    | Fold change by qPCR array* | P value |
| Interleukin 10                                                                                                    | IL-10          | 318.2572951                | 0.0384  |
| Lymphotoxin A                                                                                                     | Lta            | 317.4450426                | 0.0313  |
| Tumor necrosis factor                                                                                             | TNF            | 199.9189105                | 0.0476  |
| Interleukin 12B                                                                                                   | IL-12b         | 190.0718692                | 0.0388  |
| Chemokine (C-X-C motif) ligand 5                                                                                  | cxcl5          | 50.09473961                | 0.0378  |
| Colony stimulating factor 2 (granulocyte-macrophage)                                                              | Csf2 or GM-CSF | 5.062766526                | 0.0387  |
| Thrombopoietin                                                                                                    | Thpo           | 1.420995198                | 0.0380  |
| Bone morphogenetic protein 2                                                                                      | Bmp2           | 0.647943946                | 0.0143  |
| Bone morphogenetic protein 7                                                                                      | Bmp7           | 0.639018584                | 0.0369  |
| Macrophage migration inhibitory factor                                                                            | Mif            | 0.593148809                | 0.0417  |
| Bone morphogenetic protein 4                                                                                      | Bmp4           | 0.525470363                | 0.0405  |
| Cardiotrophin 1                                                                                                   | ctf1           | 0.478189772                | 0.0268  |
| Interleukin 12A                                                                                                   | Il-12a         | 0.249996492                | 0.0406  |

\* *L2/IKK $\beta$ ca* mice compared with littermate controls

**Supplemental Table 2. Immune cell counts by organ**

|           |                                  | Raw           |               |       | Log-transformed |             |       |
|-----------|----------------------------------|---------------|---------------|-------|-----------------|-------------|-------|
| Organ     | Cell type                        | CONTROL       | MUTANT        | p     | LN_CONTROL      | LN_MUTANT   | p     |
| Esophagus | CD45+                            | 8.31 (4.13)   | 18.88 (13.74) | 0.271 | 2.16 (0.46)     | 2.69 (1.10) | 0.488 |
| Spleen    | CD45+                            | 67.60 (3.97)  | 63.50 (19.83) | 0.743 | 4.23 (0.06)     | 4.13 (0.34) | 0.654 |
| Esophagus | T cells (CD45+CD3+)              | 21.29 (17.14) | 18.43 (3.45)  | 0.791 | 2.73 (1.23)     | 2.96 (0.18) | 0.769 |
| Spleen    | T cells (CD45+CD3+)              | 24.47 (13.29) | 17.53 (5.95)  | 0.456 | 3.16 (0.48)     | 2.89 (0.31) | 0.462 |
| Esophagus | Th (CD45+CD3+CD4+)               | 31.27 (21.77) | 46.73 (10.54) | 0.330 | 3.34 (0.62)     | 3.85 (0.21) | 0.245 |
| Spleen    | Th (CD45+CD3+CD4+)               | 55.83 (14.13) | 48.70 (24.01) | 0.680 | 4.02 (0.27)     | 3.80 (0.61) | 0.600 |
| Esophagus | CD44+ Th                         | 45.43 (18.13) | 26.97 (6.07)  | 0.170 | 3.78 (0.45)     | 3.31 (0.23) | 0.192 |
| Spleen    | CD44+ Th                         | 28.80 (5.46)  | 28.03 (1.36)  | 0.825 | 3.38 (0.18)     | 3.37 (0.05) | 0.894 |
| Esophagus | Tregs (CD45+CD3+CD4+CD44+FoxP3+) | 2.34 (4.05)   | 1.43 (1.72)   | 0.737 | 0.69 (1.20)     | 0.71 (0.73) | 0.984 |
| Spleen    | Tregs (CD45+CD3+CD4+CD44+FoxP3+) | 6.43 (2.11)   | 3.00 (2.42)   | 0.138 | 1.97 (0.32)     | 1.27 (0.58) | 0.139 |
| Esophagus | Tregs (CD45+CD3+CD4+FoxP3+)      | 12.43 (12.50) | 4.37 (5.12)   | 0.359 | 1.95 (1.72)     | 1.27 (1.21) | 0.605 |
| Spleen    | Tregs (CD45+CD3+CD4+FoxP3+)      | 12.67 (2.14)  | 10.86 (7.77)  | 0.718 | 2.61 (0.15)     | 2.32 (0.68) | 0.520 |
| Esophagus | CTL (CD45+CD3+CD8+)              | 26.40 (18.36) | 27.20 (4.59)  | 0.945 | 3.18 (0.61)     | 3.33 (0.16) | 0.694 |
| Spleen    | CTL (CD45+CD3+CD8+)              | 29.03 (5.14)  | 36.90 (14.38) | 0.423 | 3.39 (0.17)     | 3.59 (0.36) | 0.432 |
| Esophagus | CD44+CTL                         | 46.33 (27.57) | 34.00 (9.44)  | 0.504 | 3.73 (0.65)     | 3.53 (0.30) | 0.652 |
| Spleen    | CD44+CTL                         | 35.53 (10.42) | 37.27 (3.07)  | 0.796 | 3.57 (0.32)     | 3.64 (0.08) | 0.710 |
| Esophagus | MDSC (CD45+Gr1+CD11b+)           | 2.42 (1.76)   | 14.76 (12.20) | 0.158 | 1.10 (0.67)     | 2.57 (0.72) | 0.061 |
| Spleen    | MDSC (CD45+Gr1+CD11b+)           | 2.68 (2.50)   | 24.43 (23.27) | 0.183 | 1.13 (0.76)     | 2.93 (0.97) | 0.065 |
| Esophagus | DC (CD45+CD11c+)                 | 4.73 (2.14)   | 4.19 (1.24)   | 0.726 | 1.70 (0.38)     | 1.63 (0.23) | 0.800 |
| Spleen    | DC (CD45+CD11c+)                 | 2.49 (0.55)   | 3.17 (0.25)   | 0.118 | 1.24 (0.16)     | 1.43 (0.06) | 0.133 |
| Esophagus | NK (CD45+CD49b+)                 | 3.23 (0.97)   | 3.60 (0.98)   | 0.666 | 1.42 (0.25)     | 1.51 (0.22) | 0.673 |
| Spleen    | NK (CD45+CD49b+)                 | 2.64 (0.80)   | 1.74 (0.75)   | 0.229 | 1.27 (0.23)     | 0.98 (0.30) | 0.251 |
| Esophagus | Macrophages (CD45+F4/80+)        | 4.26 (2.66)   | 4.89 (1.59)   | 0.743 | 1.54 (0.65)     | 1.75 (0.30) | 0.644 |
| Spleen    | Macrophages (CD45+F4/80+)        | 2.68 (0.57)   | 5.03 (2.98)   | 0.249 | 1.29 (0.15)     | 1.72 (0.45) | 0.194 |

Model based type III p-value for mutant / control log transformed immune cell counts

| Cell type                        | Pr > ChiSq |
|----------------------------------|------------|
| CD45+                            | 0.442      |
| T cells (CD45+CD3+)              | 0.911      |
| Th (CD45+CD3+CD4+)               | 0.582      |
| CD44+ Th                         | 0.194      |
| Tregs (CD45+CD3+CD4+CD44+FoxP3+) | 0.391      |
| Tregs (CD45+CD3+CD4+FoxP3+)      | 0.423      |
| CTL (CD45+CD3+CD8+)              | 0.279      |
| CD44+CTL                         | 0.793      |
| MDSC (CD45+Gr1+CD11b+)           | 0.036      |
| DC (CD45+CD11c+)                 | 0.659      |
| NK (CD45+CD49b+)                 | 0.547      |
| Macrophages (CD45+F4/80+)        | 0.227      |



**Supplementary Table 3.** Clinicopathological characteristics of patients with esophageal squamous cell carcinoma.

| <b>Characteristic</b>     | <b>No. of patients<br/>(n=96)</b> | <b>Percent</b> |
|---------------------------|-----------------------------------|----------------|
| <b>Sex</b>                |                                   |                |
| Male                      | 85                                | 88.54          |
| Female                    | 11                                | 11.46          |
| <b>Age</b>                |                                   |                |
| ≤ 60                      | 26                                | 27.08          |
| > 60                      | 70                                | 72.9           |
| <b>Histological grade</b> |                                   |                |
| Well differentiated       | 38                                | 39.58          |
| Moderately differentiated | 40                                | 41.67          |
| Poorly differentiated     | 18                                | 18.75          |
| <b>Tumor Stage</b>        |                                   |                |
| T1                        | 5                                 | 5.21           |
| T2A                       | 19                                | 19.79          |
| T2B                       | 9                                 | 9.38           |
| T3                        | 27                                | 28.13          |
| T4                        | 36                                | 37.50          |

**Supplementary Table 4.** Number of patients used for the scoring of each marker across pathology diagnosis

| Pathology diagnosis   | Marker | N  |
|-----------------------|--------|----|
| Normal esophagus      | GM-CSF | 5  |
|                       | MVD    | 5  |
|                       | p65    | 5  |
|                       | TNF    | 5  |
|                       | CD45   | 5  |
| Adjacent normal       | GM-CSF | 38 |
|                       | MVD    | 12 |
|                       | p65    | 38 |
|                       | TNF    | 38 |
|                       | CD45   | 38 |
| Adjacent inflammation | GM-CSF | 12 |
|                       | MVD    | 4  |
|                       | p65    | 12 |
|                       | TNF    | 12 |
|                       | CD45   | 12 |
| ESCC                  | GM-CSF | 96 |
|                       | MVD    | 23 |
|                       | p65    | 96 |
|                       | TNF    | 96 |
|                       | CD45   | 96 |

**Supplementary Table 5.** Comparison of markers across pathologic diagnoses.

|               |               | (A) Normal<br>esophagus | (B) Adjacent<br>Normal | (C) Adjacent<br>Inflammation | (D)<br>ESCC |
|---------------|---------------|-------------------------|------------------------|------------------------------|-------------|
| <i>GM-CSF</i> | <i>Mean</i>   | 0.00                    | 0.89                   | 1.33                         | 2.36        |
|               | <i>Std</i>    | 0.00                    | 0.83                   | 0.89                         | 0.90        |
|               | <i>Min</i>    | 0.00                    | 0.00                   | 0.00                         | 0.00        |
|               | <i>Q1</i>     | 0.00                    | 0.00                   | 1.00                         | 2.00        |
|               | <i>Median</i> | 0.00                    | 1.00                   | 1.00                         | 2.50        |
|               | <i>Q3</i>     | 0.00                    | 1.50                   | 2.00                         | 3.00        |
|               | <i>Max</i>    | 0.00                    | 2.50                   | 3.00                         | 4.00        |
| <i>MVD</i>    | <i>Mean</i>   | 21.50                   | 36.79                  | 52.03                        | 79.42       |
|               | <i>Std</i>    | 6.17                    | 5.03                   | 9.18                         | 14.43       |
|               | <i>Min</i>    | 14.50                   | 30.70                  | 41.60                        | 43.00       |
|               | <i>Q1</i>     | 18.00                   | 32.15                  | 44.65                        | 72.20       |
|               | <i>Median</i> | 19.00                   | 36.50                  | 52.10                        | 78.20       |
|               | <i>Q3</i>     | 27.50                   | 40.45                  | 59.40                        | 85.20       |
|               | <i>Max</i>    | 28.50                   | 45.00                  | 62.30                        | 113.60      |
| <i>p65</i>    | <i>Mean</i>   | 0.00                    | 0.75                   | 1.58                         | 2.62        |
|               | <i>Std</i>    | 0.00                    | 0.85                   | 0.90                         | 0.82        |
|               | <i>Min</i>    | 0.00                    | 0.00                   | 0.00                         | 0.50        |
|               | <i>Q1</i>     | 0.00                    | 0.00                   | 1.00                         | 2.00        |
|               | <i>Median</i> | 0.00                    | 0.75                   | 2.00                         | 2.50        |
|               | <i>Q3</i>     | 0.00                    | 1.00                   | 2.00                         | 3.00        |
|               | <i>Max</i>    | 0.00                    | 3.00                   | 3.00                         | 4.00        |

---

|             |               | (A) Normal<br>esophagus | (B) Adjacent<br>Normal | (C) Adjacent<br>Inflammation | (D)<br>ESCC |
|-------------|---------------|-------------------------|------------------------|------------------------------|-------------|
| <i>TNF</i>  | <i>Mean</i>   | 0.00                    | 0.24                   | 1.08                         | 1.79        |
|             | <i>Std</i>    | 0.00                    | 0.43                   | 0.67                         | 0.83        |
|             | <i>Min</i>    | 0.00                    | 0.00                   | 0.00                         | 0.00        |
|             | <i>Q1</i>     | 0.00                    | 0.00                   | 1.00                         | 1.00        |
|             | <i>Median</i> | 0.00                    | 0.00                   | 1.00                         | 1.75        |
|             | <i>Q3</i>     | 0.00                    | 0.00                   | 1.50                         | 2.50        |
|             | <i>Max</i>    | 0.00                    | 1.00                   | 2.00                         | 4.00        |
| <i>CD45</i> | <i>Mean</i>   | 0.60                    | 0.70                   | 2.17                         | 2.13        |
|             | <i>Std</i>    | 0.55                    | 0.51                   | 0.39                         | 0.84        |
|             | <i>Min</i>    | 0.00                    | 0.00                   | 2.00                         | 0.00        |
|             | <i>Q1</i>     | 0.00                    | 0.00                   | 2.00                         | 1.50        |
|             | <i>Median</i> | 1.00                    | 1.00                   | 2.00                         | 2.00        |
|             | <i>Q3</i>     | 1.00                    | 1.00                   | 2.00                         | 2.50        |
|             | <i>Max</i>    | 1.00                    | 2.00                   | 3.00                         | 4.00        |

---

**Supplementary Table 6.** Correlations between markers in patients with esophageal squamous cell cancer.

| <i>Variable</i> | <i>With Variable</i> | <i>N</i> | <i>Correlation Estimate</i> | <i>95% Confidence Limits</i> |          | <i>p Value for H0:Rho=0</i> |
|-----------------|----------------------|----------|-----------------------------|------------------------------|----------|-----------------------------|
| GM-CSF          | MVD                  | 23       | 0.33392                     | -0.090779                    | 0.655848 | 0.1124                      |
| GM-CSF          | p65                  | 96       | 0.53097                     | 0.369860                     | 0.661085 | <.0001                      |
| GM-CSF          | TNF                  | 96       | 0.36414                     | 0.176539                     | 0.526208 | 0.0002                      |
| GM-CSF          | CD45                 | 96       | 0.11539                     | -0.087107                    | 0.308737 | 0.2611                      |
| MVD             | p65                  | 23       | 0.08161                     | -0.342102                    | 0.477740 | 0.7082                      |
| MVD             | TNF                  | 23       | 0.01558                     | -0.399189                    | 0.425050 | 0.9432                      |
| MVD             | CD45                 | 23       | 0.10477                     | -0.321309                    | 0.495569 | 0.6304                      |
| p65             | TNF                  | 96       | 0.36480                     | 0.177275                     | 0.526756 | 0.0002                      |
| p65             | CD45                 | 96       | 0.00270                     | -0.197896                    | 0.203073 | 0.9791                      |
| TNF             | CD45                 | 96       | 0.20332                     | 0.002959                     | 0.387995 | 0.0456                      |

**Supplementary Table 7.** Correlations between markers and clinical variables in patients with esophageal squamous cell cancer.

| <i>Variable</i> | <i>With Variable</i> | <i>N</i> | <i>Correlation Estimate</i> | <i>95% Confidence Limits</i> |          | <i>p Value for H0:Rho=0</i> |
|-----------------|----------------------|----------|-----------------------------|------------------------------|----------|-----------------------------|
| GM-CSF          | months               | 96       | 0.10475                     | -0.097790                    | 0.298957 | 0.3081                      |
| GM-CSF          | age                  | 96       | 0.07427                     | -0.128124                    | 0.270725 | 0.4707                      |
| GM-CSF          | stage                | 96       | -0.11580                    | -0.309108                    | 0.086700 | 0.2595                      |
| GM-CSF          | grade                | 96       | -0.10970                    | -0.303510                    | 0.092828 | 0.2856                      |
| MVD             | months               | 23       | 0.40290                     | -0.011156                    | 0.699012 | 0.0510                      |
| MVD             | age                  | 23       | -0.35999                    | -0.672416                    | 0.061306 | 0.0849                      |
| MVD             | stage                | 23       | -0.06610                    | -0.465613                    | 0.355799 | 0.7620                      |
| MVD             | grade                | 23       | -0.18718                    | -0.556448                    | 0.243836 | 0.3862                      |
| p65             | months               | 96       | 0.04780                     | -0.154165                    | 0.245928 | 0.6428                      |
| p65             | age                  | 96       | 0.05873                     | -0.143443                    | 0.256201 | 0.5687                      |
| p65             | stage                | 96       | -0.05357                    | -0.251358                    | 0.148509 | 0.6032                      |
| p65             | grade                | 96       | -0.15431                    | -0.344150                    | 0.047648 | 0.1316                      |
| TNF             | months               | 96       | 0.13724                     | -0.065032                    | 0.328685 | 0.1806                      |
| TNF             | age                  | 96       | 0.17821                     | -0.023103                    | 0.365631 | 0.0808                      |
| TNF             | stage                | 96       | -0.18959                    | -0.375791                    | 0.011328 | 0.0628                      |
| TNF             | grade                | 96       | -0.09196                    | -0.287153                    | 0.110563 | 0.3713                      |
| CD45            | months               | 96       | 0.00420                     | -0.196451                    | 0.204514 | 0.9675                      |
| CD45            | age                  | 96       | 0.05322                     | -0.148855                    | 0.251027 | 0.6056                      |
| CD45            | stage                | 96       | -0.13497                    | -0.326617                    | 0.067339 | 0.1880                      |
| CD45            | grade                | 96       | 0.03515                     | -0.166505                    | 0.233991 | 0.7331                      |

### Supplementary Figure legends

**Supplementary Figure 1.** Activated IKK $\beta$  was expressed in esophageal epithelia of *L2/IKK $\beta$ ca* mice (A) Targeting strategy for the generation of *ED-L2-Cre/Rosa26-IKK2ca<sup>SFL</sup>* mice. (B) Western blot of epithelial scrapings from 1.5 month-old mice revealed activation of IKK $\beta$ /NF $\kappa$ B signaling in *L2/IKK $\beta$ ca* mice (Mut), demonstrated by increased IKK $\beta$  expression and reduced I $\kappa$ B levels compared to *IKK $\beta$ ca<sup>SFL</sup>* controls (Con).  $\beta$ -actin was a loading control. (C- D) GFP (green) was not expressed in *IKK $\beta$ ca<sup>SFL</sup>* mice (C) but was observed in esophageal epithelia of *L2/IKK $\beta$ ca* mice (D), indicating Cre-mediated recombination in these cells. DAPI was used as a nuclear stain. Scale bars, 10 $\mu$ m.

**Supplementary Figure 2.** *L2/IKK $\beta$ ca* mutant mice had increased proliferation and apoptosis in esophageal epithelia. (A) Quantitation of BrdU-labeled cells revealed a statistically significant increase in cell proliferation in *L2/IKK $\beta$ ca* mutant mice (P<0.05) at 4 weeks, 6 weeks, and 3 months of age. (B-C) Compared with littermate controls (B), *L2/IKK $\beta$ ca* mutant mice (C) showed increased numbers of apoptotic cells in the superficial layers of esophageal epithelia at 3 months of age by TUNEL staining. DAPI was used as a nuclear stain. Scale bars, 50 $\mu$ m.

**Supplementary Figure 3.** *L2/IKK $\beta$ ca* mutant mice had squamous epithelial hypertrophy of the tongue and the ventral neck skin but not the forestomach. Control tongue (A), forestomach (C), and skin (E), from 1.5 month-old mice were examined, as well as tongue (B), forestomach (D), and skin (F), of matched *L2/IKK $\beta$ ca* mice. Scale bars, 50 $\mu$ m (A-D), 100 $\mu$ m (E-F).

**Supplementary Figure 4.** Activation of epithelial IKK $\beta$  signaling leads to increased GM-CSF expression in esophageal epithelia of mice. (A-B) At 4 weeks of age, *L2-IKK $\beta$ ca* mice (B) had

increased GM-CSF, indicated by brown staining within epithelial cells, compared to littermate controls (A). Scale bars, 50 $\mu$ m.

**Supplementary Figure 5.** Intraepithelial leukocytes were present in *L2/IKK $\beta$ ca* mice treated with an IgG2a control antibody (A) or with a blocking antibody against GM-CSF (B), as indicated by staining for CD45. Scale bars: 25 $\mu$ m.

**Supplementary Figure 6.** Representative IHC panels from normal esophagus, cancer adjacent area (normal), cancer adjacent (inflammation) and ESCC from human patients. Expression of GM-CSF, VWF, p65 NF $\kappa$ B, TNF and CD45 increased progressively in cancer adjacent area with inflammation and ESCC, compared to normal esophagus and cancer adjacent area (normal). Scale bars: 50 $\mu$ m.

**Supplementary Figure 7.** p65 NF $\kappa$ B expression increases from normal to inflamed tissues and from inflamed tissues to ESCC. (A) Box plots indicate the scoring of p65 NF $\kappa$ B expression by pathologic diagnosis for human patients with normal esophagus, esophageal cancer adjacent area (normal), esophageal cancer adjacent area (inflammation), and esophageal squamous cell cancer (ESCC, tumor). *Dots* represent outliers and *diamonds* represents the mean values. The number of patients analyzed per pathologic diagnosis is detailed in Supplementary Table 4. (B-C) Overall (B) and pairwise (C) significance of the data represented in (A). All statistical tests assumed a 5% level of significance.

**Supplementary Figure 8.** Increasing angiogenesis is seen during progression from normal to inflamed tissues and from inflamed tissues to ESCC. (A) Box plots indicate the scoring of microvessel density (MVD) by pathologic diagnosis for human patients with normal esophagus, esophageal cancer adjacent area (normal), esophageal cancer adjacent area (inflammation), and



esophageal squamous cell cancer (ESCC, tumor). *Dots* represent outliers and *diamonds* represents the mean values. The number of patients analyzed per pathologic diagnosis is detailed in Supplementary Table 4. **(B-C)** Overall **(B)** and pairwise **(C)** significance of the data represented in **(A)**. All statistical tests assumed a 5% level of significance.

**Supplementary Figure 9.** GM-CSF expression increases from normal to inflamed tissues and from inflamed tissues to ESCC. **(A)** Box plots indicate the scoring of GM-CSF levels by pathologic diagnosis for human patients with normal esophagus, esophageal cancer adjacent area (normal), esophageal cancer adjacent area (inflammation), and esophageal squamous cell cancer (ESCC, tumor). *Dots* represent outliers and *diamonds* represents the mean values. The number of patients analyzed per pathologic diagnosis is detailed in Supplementary Table 4. **(B-C)** Overall **(B)** and pairwise **(C)** significance of the data represented in **(A)**. All statistical tests assumed a 5% level of significance.

**Supplementary Figure 10.** TNF expression increases from normal to inflamed tissues and from inflamed tissues to ESCC. **(A)** Box plots indicate the scoring of TNF expression by pathologic diagnosis of human patients with normal esophagus, esophageal cancer adjacent area (normal), esophageal cancer adjacent area (inflammation), and esophageal squamous cell cancer (ESCC, tumor). *Dots* represent outliers and *diamonds* represents the mean values. The number of patients analyzed per pathologic diagnosis is detailed in Supplementary Table 4. **(B-C)** Overall **(B)** and pairwise **(C)** significance of the data represented in **(A)**. All statistical tests assumed a 5% level of significance.

**Supplementary Figure 11.** CD45 expression is increased in ESCC compared to normal esophagus. (A) Box plots indicate the scoring of CD45 staining by pathologic diagnosis of human patients with normal esophagus, esophageal cancer adjacent area (normal), esophageal cancer adjacent area (inflammation), and esophageal squamous cell cancer (ESCC, tumor). *Dots* represent outliers and *diamonds* represents the mean values. The number of patients analyzed per pathologic diagnosis is detailed in Supplementary Table 4. (B-C) Overall (B) and pairwise (C) significance of the data represented in (A). All statistical tests assumed a 5% level of significance.

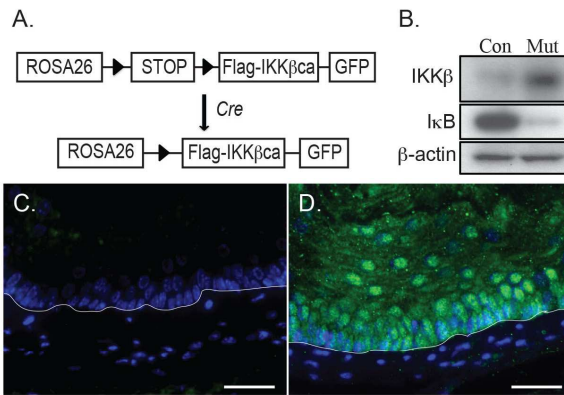

A.

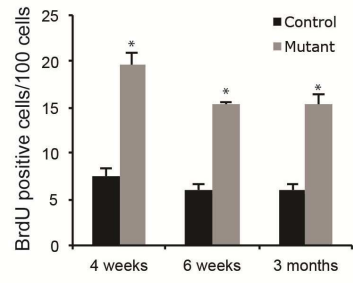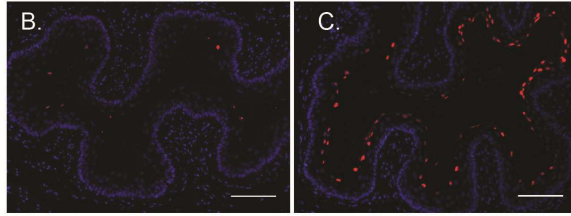

Control

*L2/IKK $\beta$ ca*

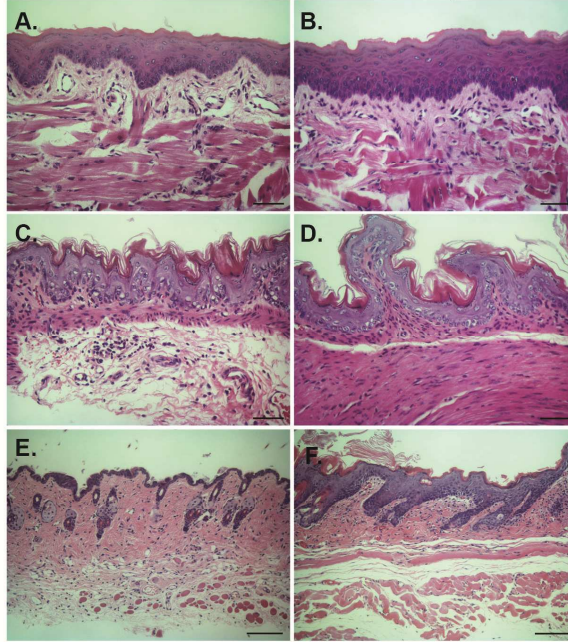

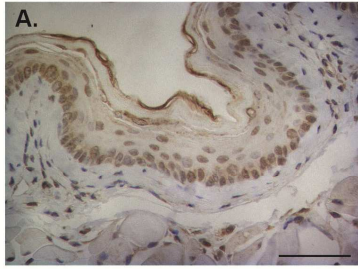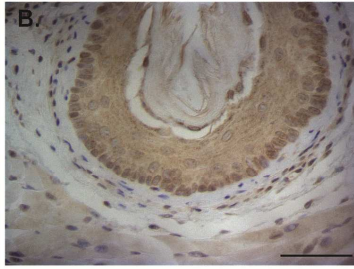

*L2/IKK $\beta$ ca* + IgG2a

*L2/IKK $\beta$ ca* + MP1-22E9

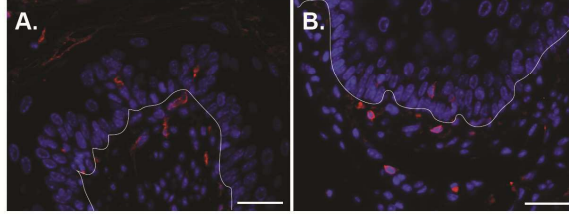



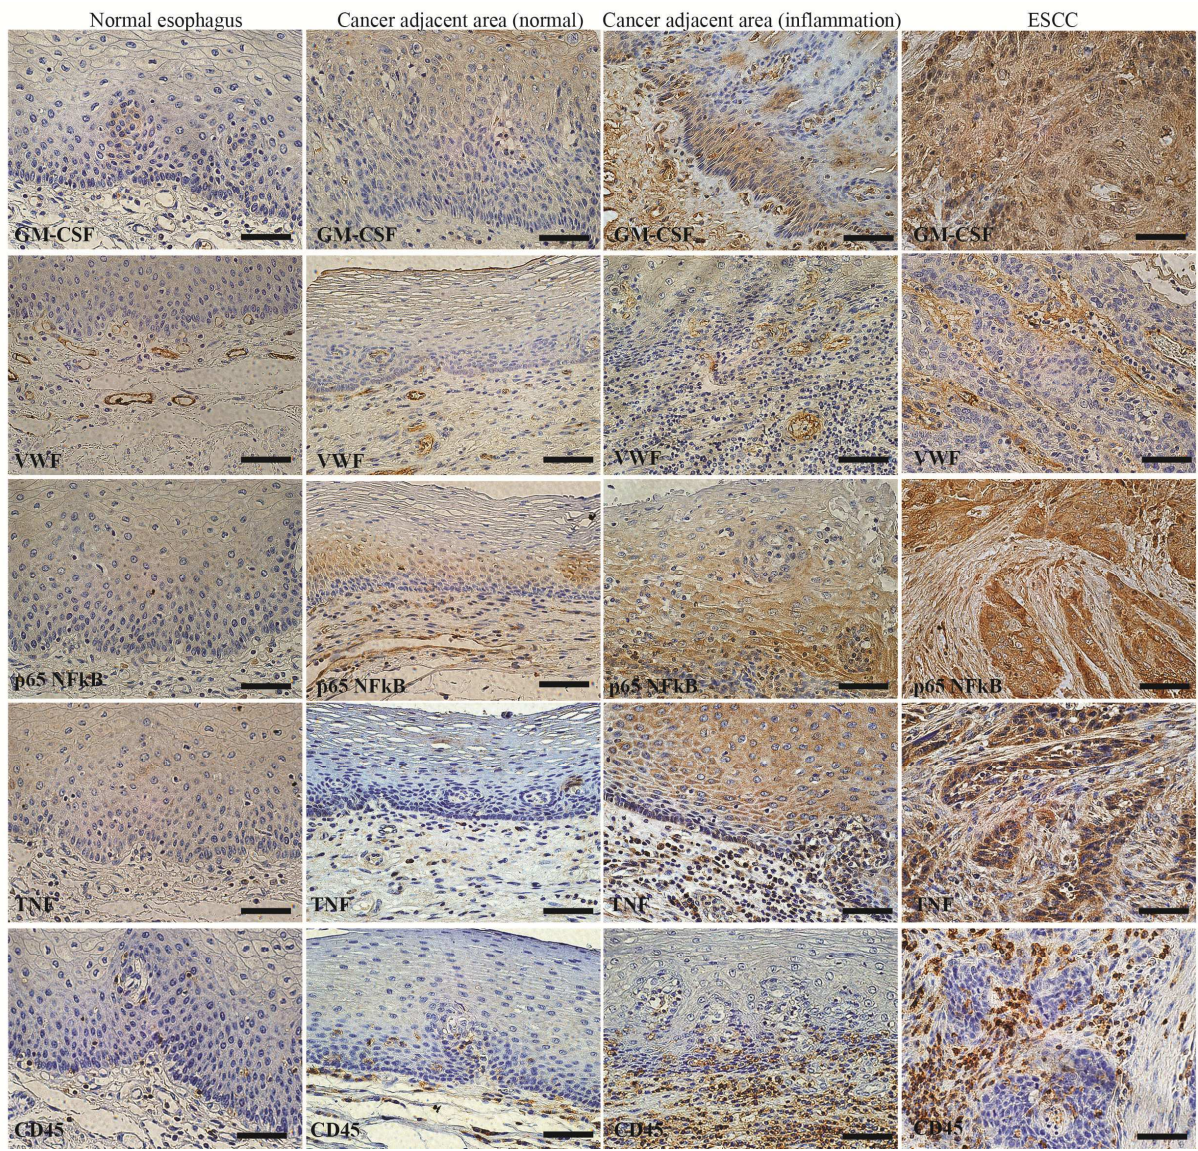



**A.**

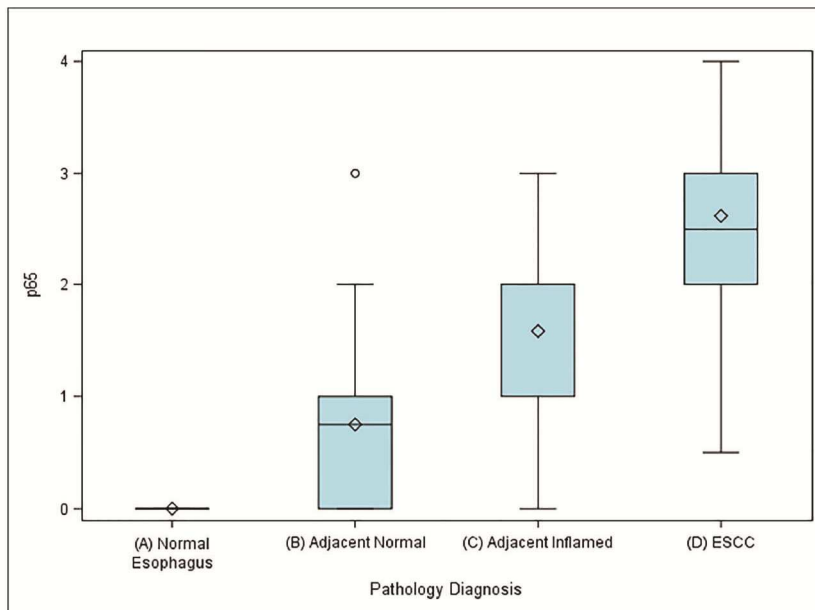

**B.**

| Pathology diagnosis   | Pr >  t |
|-----------------------|---------|
| Normal esophagus      | 1.0000  |
| Adjacent normal       | <.0001  |
| Adjacent inflammation | <.0001  |
| ESCC                  | <.0001  |

**C.**

| Pathology diagnosis   | Pathology diagnosis   | Adjusted P value |
|-----------------------|-----------------------|------------------|
| Adjacent normal       | Normal esophagus      | 0.2440           |
| Adjacent Inflammation | Normal esophagus      | 0.0032           |
| ESCC                  | Normal esophagus      | <.0001           |
| Adjacent normal       | Adjacent inflammation | 0.0065           |
| Adjacent normal       | ESCC                  | <.0001           |
| ESCC                  | Adjacent inflammation | 0.0004           |

**A.**

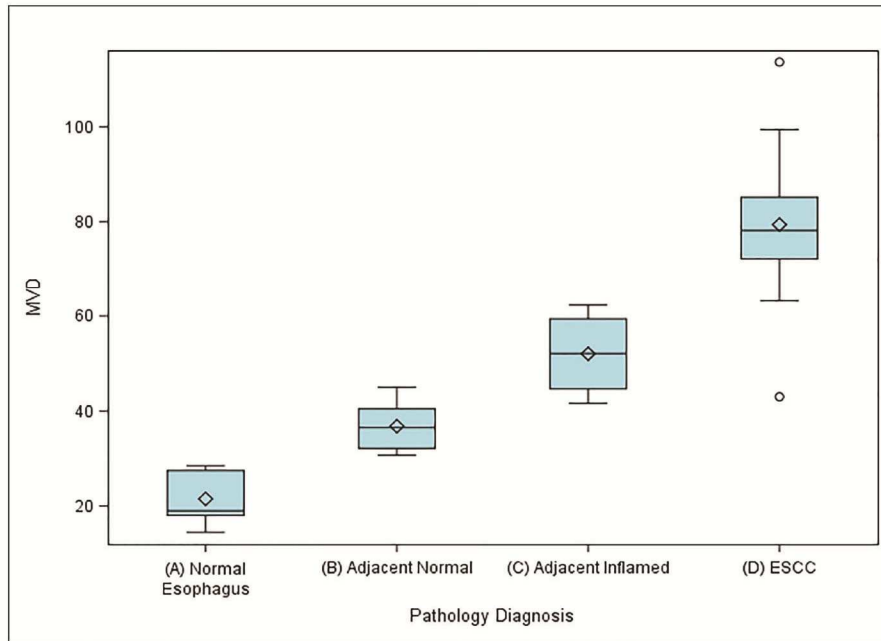

**B.**

| Pathology diagnosis   | Pr >  t |
|-----------------------|---------|
| Normal esophagus      | 0.0015  |
| Adjacent normal       | <.0001  |
| Adjacent inflammation | <.0001  |
| ESCC                  | <.0001  |

**C.**

| Pathology diagnosis   | Pathology diagnosis   | Adjusted P value |
|-----------------------|-----------------------|------------------|
| Adjacent normal       | Normal esophagus      | 0.1014           |
| Adjacent Inflammation | Normal esophagus      | 0.0126           |
| ESCC                  | Normal esophagus      | <.0001           |
| Adjacent normal       | Adjacent inflammation | 0.1014           |
| Adjacent normal       | ESCC                  | <.0001           |
| ESCC                  | Adjacent inflammation | 0.0016           |

**A.**

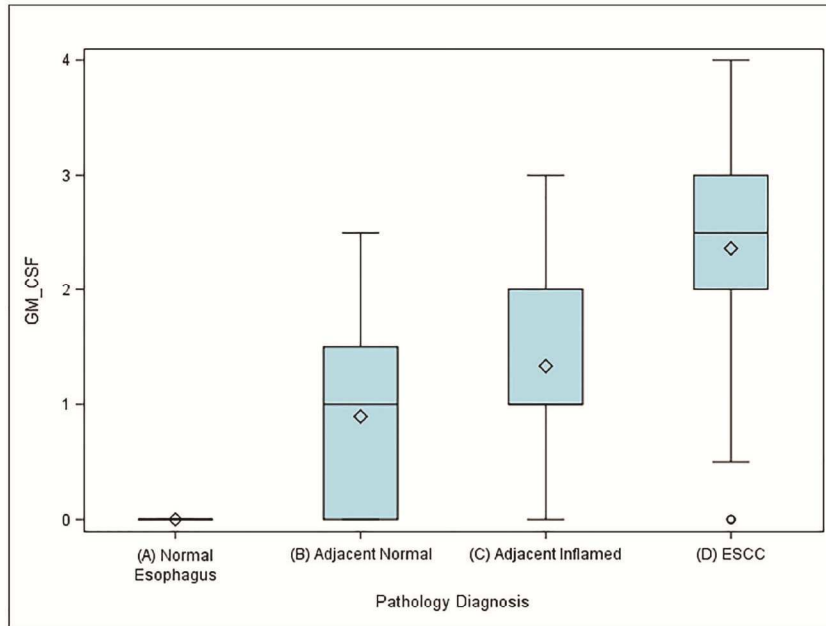

**B.**

| Pathology diagnosis   | Pr >  t |
|-----------------------|---------|
| Normal esophagus      | 1.0000  |
| Adjacent normal       | <.0001  |
| Adjacent inflammation | <.0001  |
| ESCC                  | <.0001  |

**C.**

| Pathology diagnosis   | Pathology diagnosis   | Adjusted P value |
|-----------------------|-----------------------|------------------|
| Adjacent normal       | Normal esophagus      | 0.1443           |
| Adjacent Inflammation | Normal esophagus      | 0.0179           |
| ESCC                  | Normal esophagus      | <.0001           |
| Adjacent normal       | Adjacent inflammation | 0.2260           |
| Adjacent normal       | ESCC                  | <.0001           |
| ESCC                  | Adjacent inflammation | 0.0015           |

**A.**

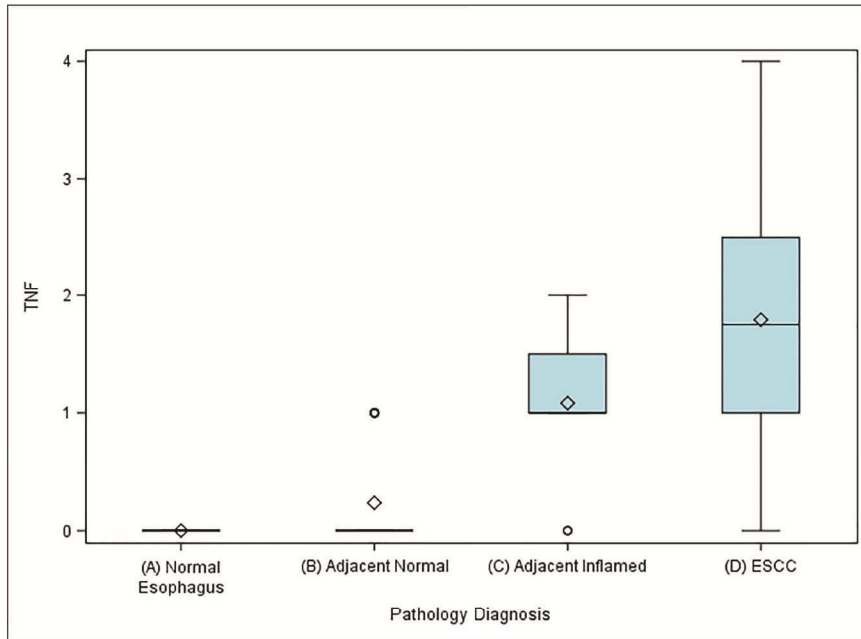

**B.**

| Pathology diagnosis   | Pr >  t |
|-----------------------|---------|
| Normal esophagus      | 1.0000  |
| Adjacent normal       | 0.0349  |
| Adjacent inflammation | <.0001  |
| ESCC                  | <.0001  |

**C.**

| Pathology diagnosis   | Pathology diagnosis   | Adjusted P value |
|-----------------------|-----------------------|------------------|
| Adjacent normal       | Normal esophagus      | 0.8869           |
| Adjacent Inflammation | Normal esophagus      | 0.0234           |
| ESCC                  | Normal esophagus      | <.0001           |
| Adjacent normal       | Adjacent inflammation | 0.0018           |
| Adjacent normal       | ESCC                  | <.0001           |
| ESCC                  | Adjacent inflammation | 0.0117           |

**A.**

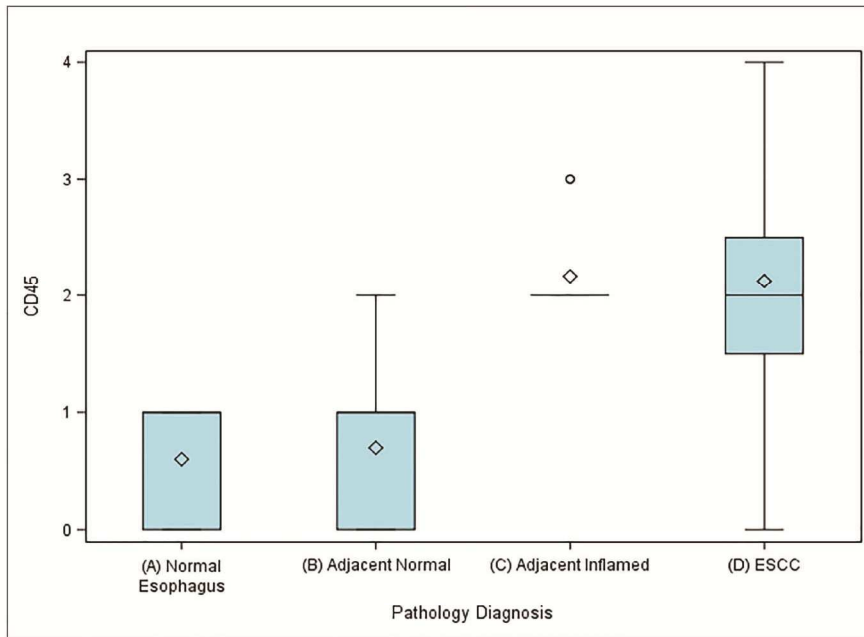

**B.**

| Pathology diagnosis   | Pr >  t |
|-----------------------|---------|
| Normal esophagus      | 0.0748  |
| Adjacent normal       | <.0001  |
| Adjacent inflammation | <.0001  |
| ESCC                  | <.0001  |

**C.**

| Pathology diagnosis   | Pathology diagnosis   | Adjusted P value |
|-----------------------|-----------------------|------------------|
| Adjacent normal       | Normal esophagus      | 0.9921           |
| Adjacent Inflammation | Normal esophagus      | 0.0017           |
| ESCC                  | Normal esophagus      | 0.0004           |
| Adjacent normal       | Adjacent inflammation | <.0001           |
| Adjacent normal       | ESCC                  | <.0001           |
| ESCC                  | Adjacent inflammation | 0.9976           |
